# Supplementary material
Source: PubMed Central journal article supplement (PMC6546358)
Supplement: krnb-16-04-1511674-s001.pdf [file krnb-16-04-1511674-s001.pdf]

# Supplementary Materials

## Tables

**Table S1.** Mass spectrometry spectral count estimates of SIRV3 and SMV1 gene products in cell extracts of coinfecting strain REY14A at 3.5 dpi. Acr - anti CRISPR protein homologs; vp - virion protein. gpx denotes a non annotated ORF.

| gene product | kDa | spectral counts | gene product | kDa | spectral counts | gene product | kDa | spectral counts |
|--------------|-----|-----------------|--------------|-----|-----------------|--------------|-----|-----------------|
| <b>SIRV3</b> |     |                 |              |     |                 |              |     |                 |
| gp01         | 6   | 6               | gp16         | 7   | 7               | gp29_vp      | 124 | 264             |
| gp02_Acr     | 11  | 24              | gp17_vp      | 18  | 12              | gp30         | 63  | 2               |
| gp03         | 13  | 80              | gp19_vp      | 14  | 100             | gp31         | 72  | 13              |
| gp04         | 14  | 1               | gp20         | 6   | 2               | gp32         | 19  | 6               |
| gp05_vp      | 15  | 3               | gp21         | 39  | 102             | gp33         | 30  | 4               |
| gp07         | 13  | 14              | gp22         | 8   | 4               | gp34         | 21  | 6               |
| gp08         | 37  | 1               | gp23         | 9   | 2               | gp35         | 42  | 23              |
| gp09         | 46  | 50              | gp24         | 13  | 14              | gp36_Acr     | 11  | 12              |
| gp10         | 7   | 23              | gp25         | 55  | 2               | gp37_Acr     | 12  | 10              |
| gp12         | 15  | 77              | gp26         | 18  | 27              | gp39         | 13  | 4               |
| gp13         | 51  | 21              | gp27         | 14  | 2               | gp40         | 17  | 21              |
| gp14         | 25  | 2               | gpx          | 8   | 28              | gp41         | 11  | 35              |
| gp15         | 9   | 22              | gp28         | 13  | 24              | gp43         | 12  | 7               |
| <b>SMV1</b>  |     |                 |              |     |                 |              |     |                 |
| gp05_vp      | 86  | 11              | gp11_vp      | 17  | 3               | gp46         | 31  | nd              |
| gp06_vp      | 14  | 2               | gp32_vp      | 11  | 2               |              |     |                 |
| gp09_vp      | 224 | 15              | gp36         | 12  | 5               |              |     |                 |

**Table S2** Altered expression of antitoxin-toxin gene pairs and IS element ORFs in coinfecting strain REY15A at early and late infection stages. + increased and - reduced transcript levels by  $\geq 2$ -fold.

| host gene ID            | amino acids | Orf                 | early                         | late  | late/early |
|-------------------------|-------------|---------------------|-------------------------------|-------|------------|
|                         |             |                     | log <sub>2</sub> fold changes |       |            |
| <b>antitoxin-toxins</b> |             |                     |                               |       |            |
| SiRe_0374               | 80          | VapB                |                               | + 2,0 | + 2,8      |
| SiRe_0373               | 131         | VapC                |                               |       | + 1,6      |
| SiRe_0403               | 73          | VapB                |                               | + 2,0 |            |
| SiRe_0402               | 120         | VapC                |                               | + 2,0 |            |
| SiRe_0743               | 81          | VapB                |                               | + 1,7 |            |
| SiRe_0744               | 137         | VapC                |                               | + 1,9 |            |
| SiRe_0888               | 76          | VapB                |                               | + 3,4 |            |
| SiRe_2170               | 73          | VapB                |                               | + 1,6 | + 1,5      |
| SiRe_2171               | 134         | VapC                |                               | + 1,6 |            |
| SiRe_0458               | 144         | HEPN-domain protein |                               | + 2,0 |            |
| <b>IS elements</b>      |             |                     |                               |       |            |
| SiRe_0690               | 401         | IS605_OrfB-TpnB     | + 1,6                         |       |            |
| SiRe_0692               | 401         | IS200/IS605_OrfB    |                               | - 3,2 | - 2,7      |
| SiRe_2602               | 401         | IS605_OrfB-TpnB     |                               | + 2,8 |            |
| SiRe_0752               | 92          | IS605_OrfB-TpnB     | + 2,7                         | + 2,0 |            |
| SiRe_0773               | 63          | IS605_OrfB-TpnB     |                               | + 3,0 |            |
| SiRe_0856               | 277         | IS110_transposase   |                               | + 1,8 |            |
| SiRe_0858               | 109         | IS6_transposase     | + 4,5                         | + 3,1 |            |
| SiRe_2529               | 164         | IS6_transposase     |                               | + 7,8 |            |
| SiRe_2432               | 249         | IS607_transposase   |                               | + 2,8 |            |
| SiRe_0449               | 275         | ISC1395_Orf1        | + 2,1                         | + 2,4 |            |
| SiRe_0463               | 236         | ISC1395_Orf2        | + 3,4                         | + 3,1 |            |

## Figure Legends

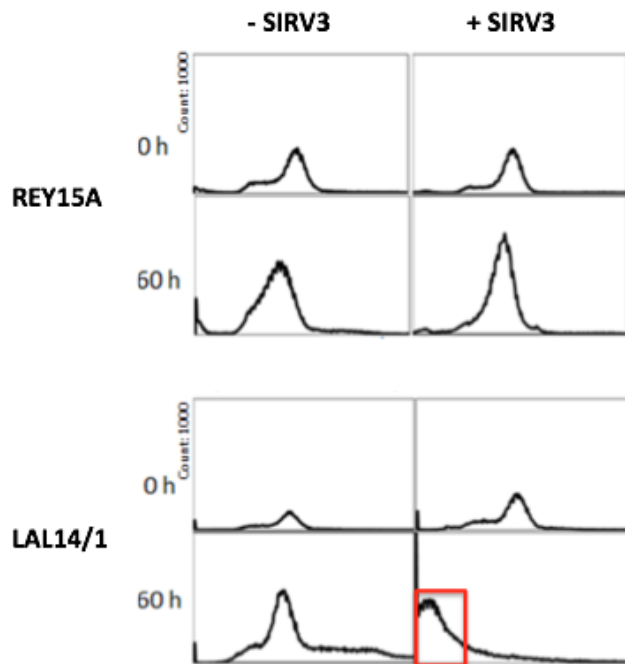

**Figure S1.** Cellular DNA content of cells that were uninfected (- SIRV3) or infected with SIRV3 (+ SIRV3) in strains REY15A (top) and LAL14/1 (below). The portion of DNA-less cells detected at 60 hpi in LAL14/1 cells is enclosed by the red rectangle.

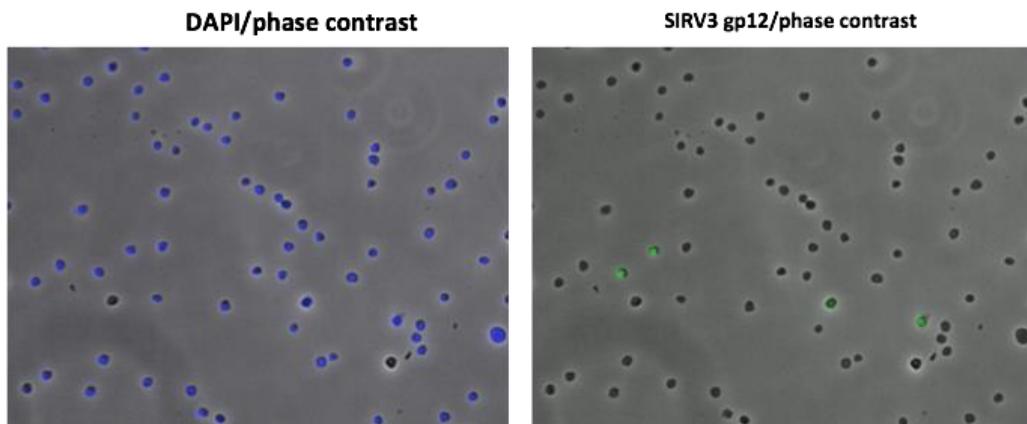

**Figure S2.** Immunofluorescence microscopy of SIRV3-infected REY15A cells. Left: merging of DNA stained with DAPI (blue) and phase contrast. Right: merging of SIRV3 gp12 staining (green) with phase contrast. The fraction of uninfected cells (Figure 3A) was measured by comparing the number of gp12 positive cells with those of DAPI-stained cells. Approximately 500 cells were analysed per sample.

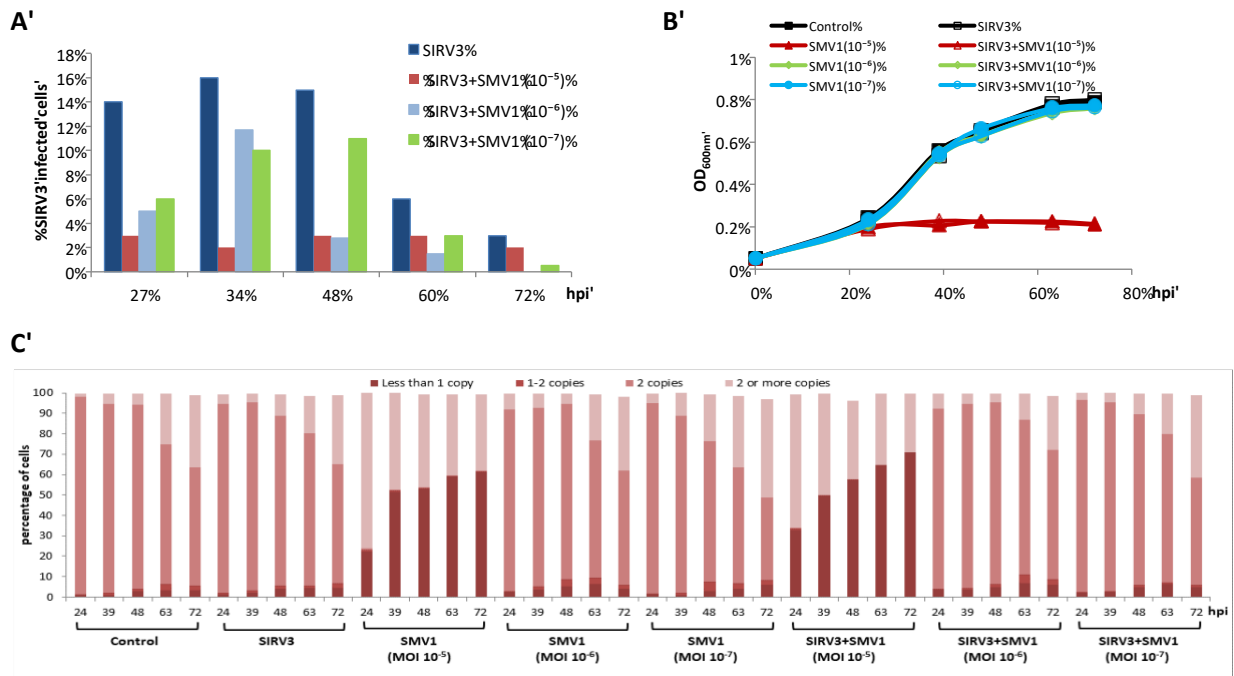

**Figure S3.** A second dataset for for strain REY15A cells infected by SIRV3 (MOI = 1 always) and SMV1 (MOIs in brackets), singly and together. A. Percentage of SIRV3-containing cells infected by SIRV3 alone, or by both viruses at increasing levels of SMV1. B. Growth curves of strain REY15A cells infected with SIRV3 or coinfecting. C. DNA content of strain REY15A cells infected by single viruses, or the mixture, analysed by flow cytometry.

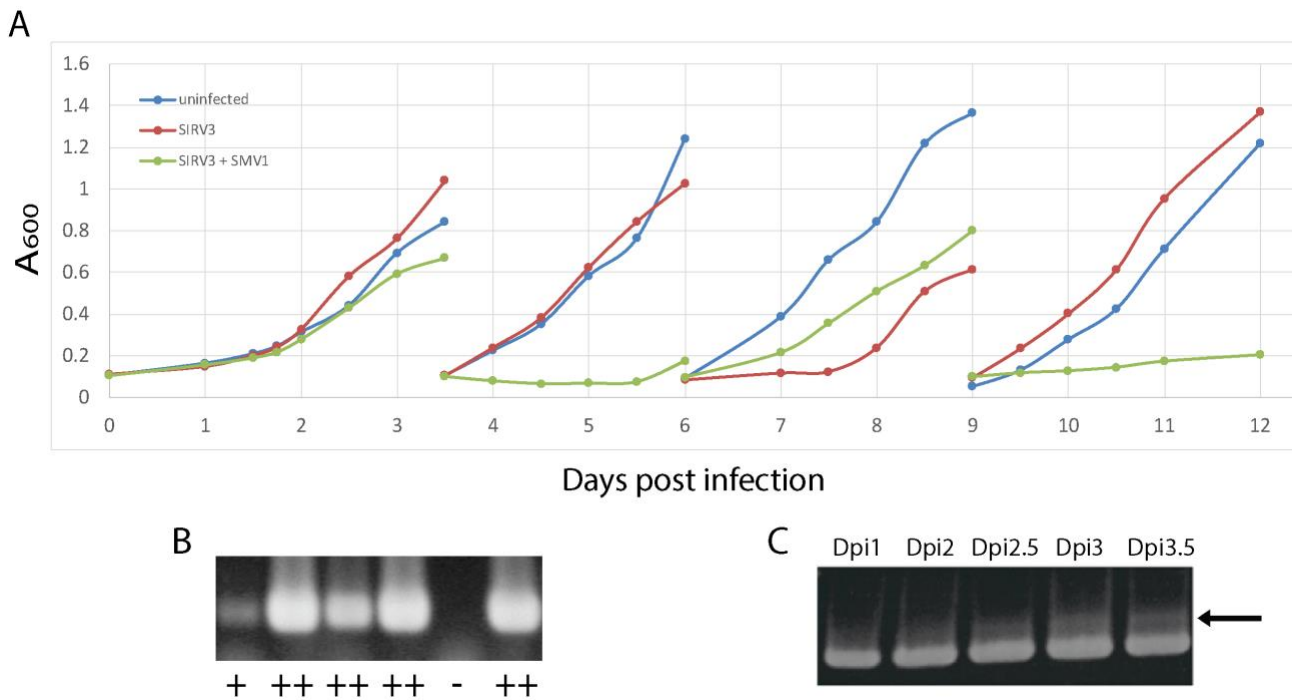

**Figure S4.** (A) Growth curves of the cultures uninfected, infected with SIRV3 and coinfecting. 50 ml samples were diluted to  $A_{600} = 0.05$  with fresh medium in every 3-4 days when uninfected control cultures exceeded  $A_{600} = 1$  to prevent cell death due to nutrient deficiency. (B) A gel example illustrating how the relative viral levels presented in Table 3 were estimated visually from the gel band intensities. (C) Example depicting how spacer acquisition was initially detected by PCR amplification of the leader-end CRISPR array. Larger PCR products, indicated by the black arrow, were observed at 3 dpi and beyond.

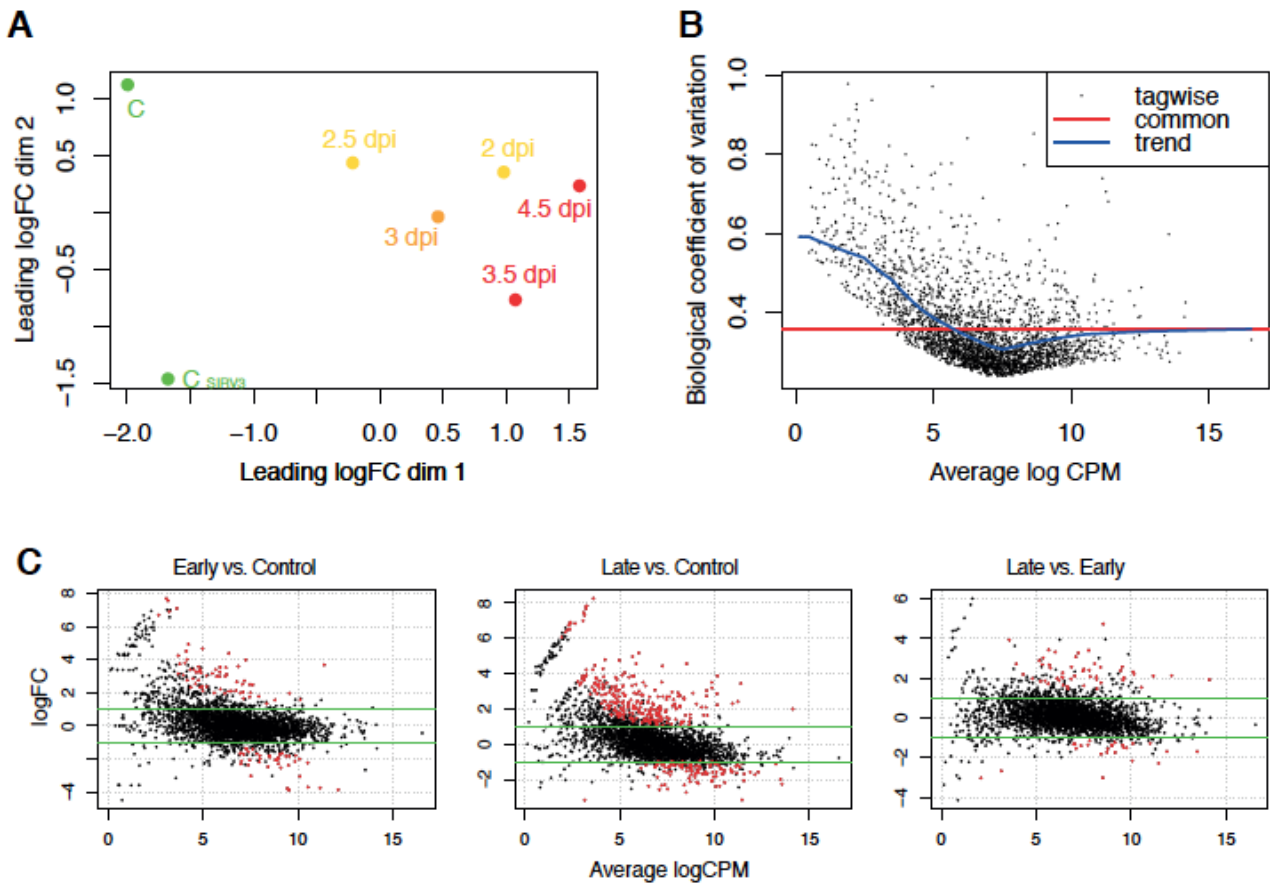

**Figure S5.** Differential transcription analysis and results overview. A. Multi-dimensional scaling (MDS) plot of the RNA samples. Distances correspond to leading log-fold-changes (logFC) between each pair of RNA samples. Colour codes highlight control (green), early infection (yellow), and late infection (orange and red) groups. Zero-read genes were assigned a value of 0.25 for the  $\log_2$  transformation ( $\text{prior.count} = 0.25$ , *plotMDS* function from the edgeR package). C and C<sub>SIRV3</sub> - controls; dpi - days post infection. B. Computed dispersion values for each gene (tagwise), transcription level (trend) and for the entire dataset (common) (*estimateDisp* function). C. Overview of differential transcription results between each group pair (*glmLRT* function); each dot represents a gene, and significantly differentially transcribed genes ( $p < 0.05$ ) are marked in red.
